# Supplementary material
Source: PubMed Central journal article supplement (PMC2807475)
Supplement: NIHMS139666-supplement-01.pdf [file NIHMS139666-supplement-01.pdf]

**Supplemental Figure 1.** *Nkx6.2* expression in the entire sections of postnatal mouse spinal cords. Cross sections from P0 (**A**), P4 (**B**), P8 (**C**), P13 (**D**), P25 (**E**), P31 (**F**), and adult (**G**) wild-type spinal cords were immunostained with anti-*Nkx6.2* antibody.

**Supplemental Figure 2.** Triple immunostaining with anti-Nkx6.2, anti-Olig2 and anti-NeuN (**A** and **B**) on transverse sections from P3 (**A**) and P8 (**B**) wild-type spinal cords. Only the ventrolateral spinal cord positions were shown. Scale bar: 100  $\mu$ m.

**Supplemental Figure 3.** Triple immunostaining with Dapi, anti-Nkx6.2 and anti-PDGFR $\alpha$  (**A**), anti-NG2 (**B**), anti-MBP (**C**), or anti-MAG (**D**) on transverse sections from P2 (**C** and **D**) and P15 (**A** and **B**) wild-type spinal cords. Arrows represented Nkx6.2+/PDGFR $\alpha$ -/NG2- cells (**A** and **B**) or Nkx6.2+/MBP+/MAG+ cells (**C** and **D**). Arrowheads indicated Nkx6.2-/PDGFR $\alpha$ + cells in **A**, Nkx6.2-/NG2+ cells in **B**, Nkx6.2+/MBP- cell in **C**, or Nkx6.2-/MAG+ cell in **D**. Scale bar: 50  $\mu$ m.

**Supplemental Figure 4.** Double immunostaining of Nkx2.2 with MAG in E9 chicken (**A-C**) and P2 mouse (**D-F**) spinal cords. Mature oligodendrocytes with strong MAG expression did not co-express Nkx2.2 (represented by arrows). Conversely, OPC cells with strong Nkx2.2 expression did not co-express MAG. Weak co-expression Nkx2.2 and MAG in the same cells is represented by arrowheads. Scale bar: 100  $\mu$ m.

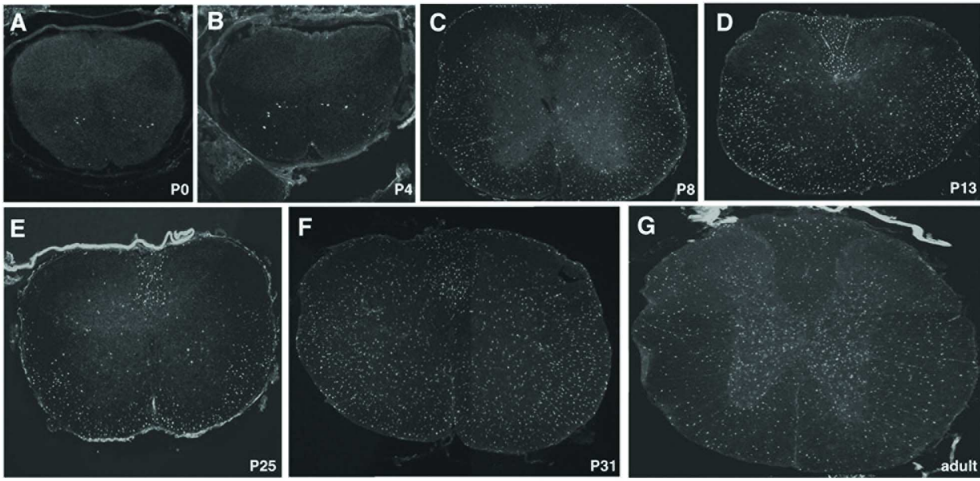

170x84mm (300 x 300 DPI)

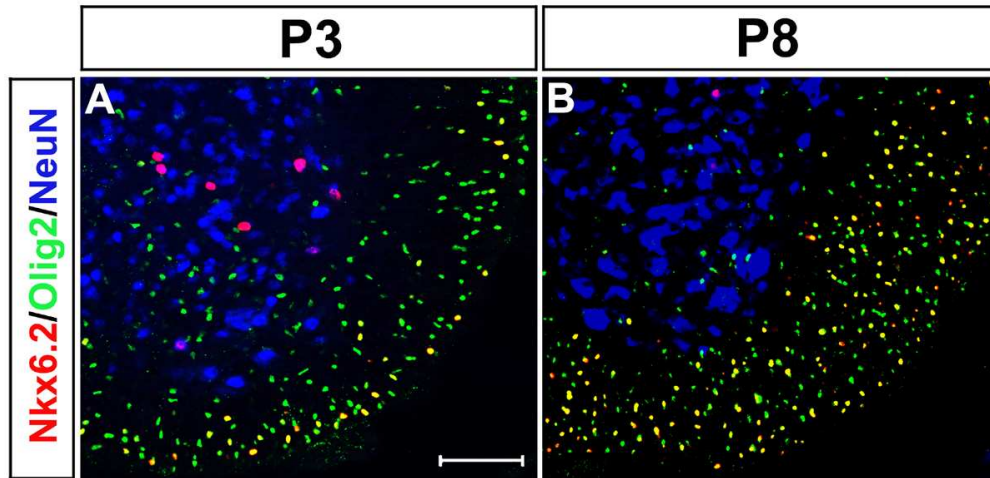

101x49mm (300 x 300 DPI)

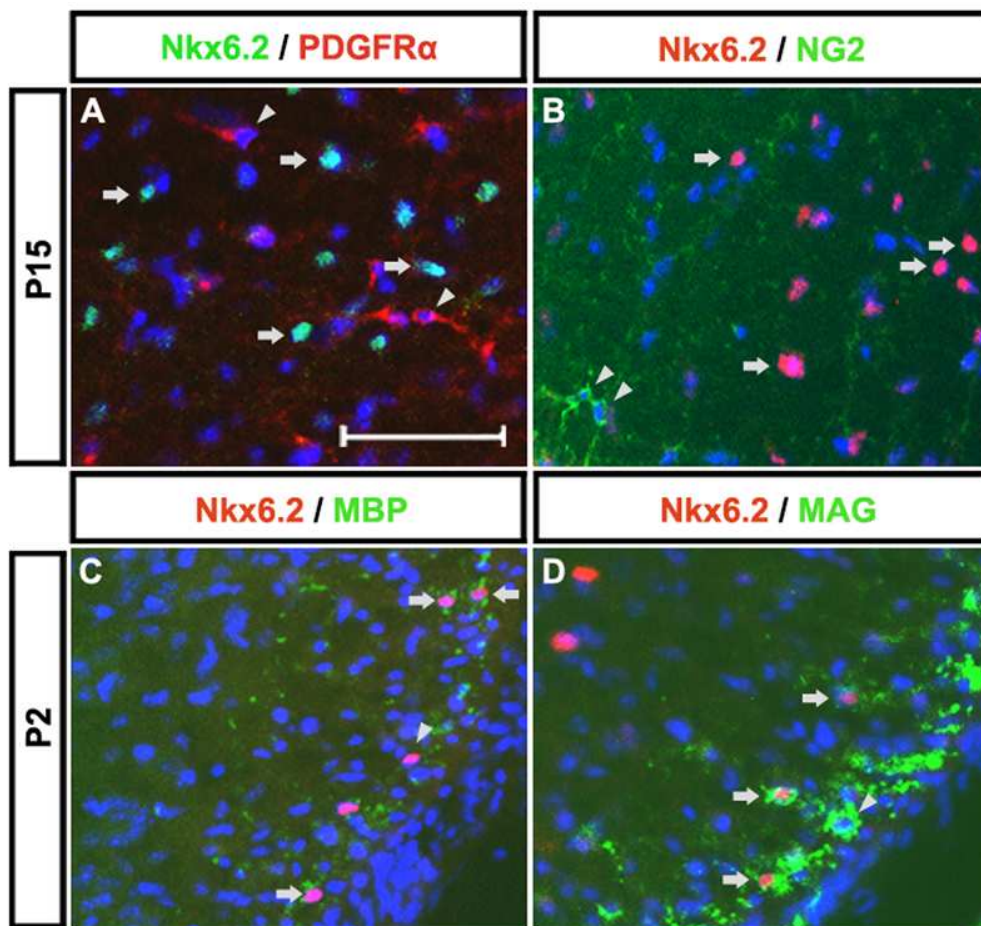

101x95mm (200 x 200 DPI)

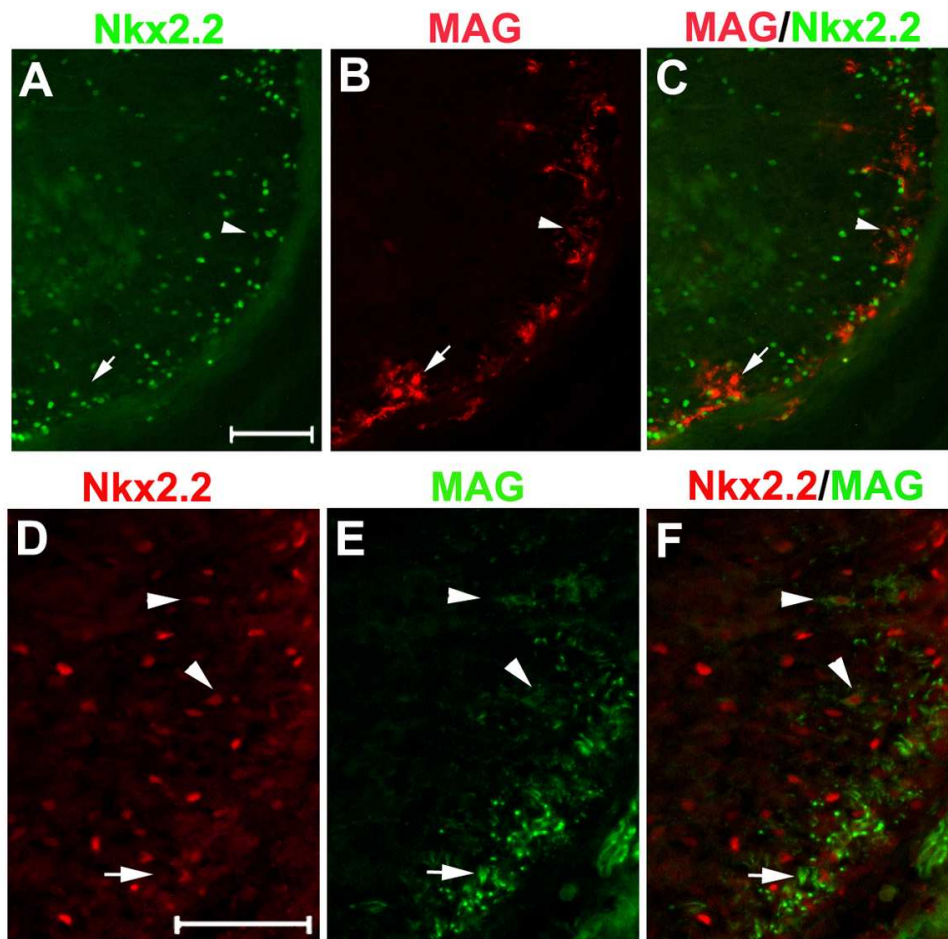

101x98mm (300 x 300 DPI)
